# Supplementary material
Source: PubMed Central journal article supplement (PMC1794310)

Relative luciferase activities

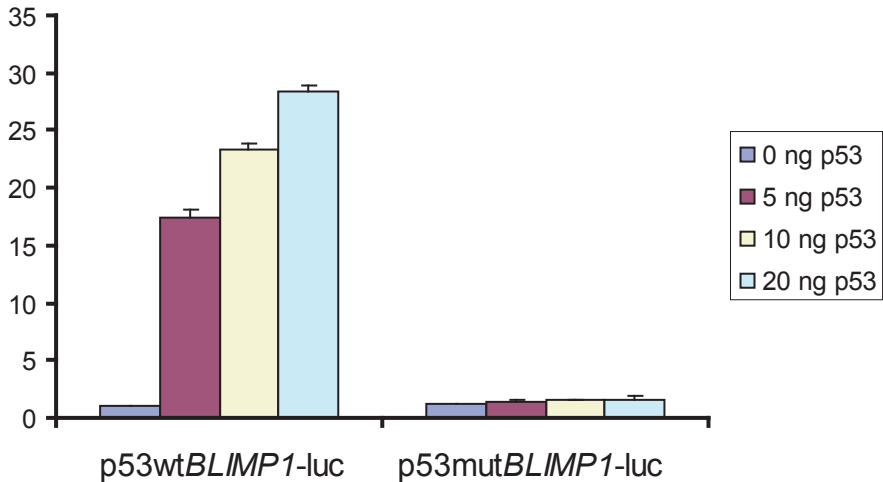

Supplement: pnas_0605562104_1.pdf [file pnas_0605562104_1.pdf]

A

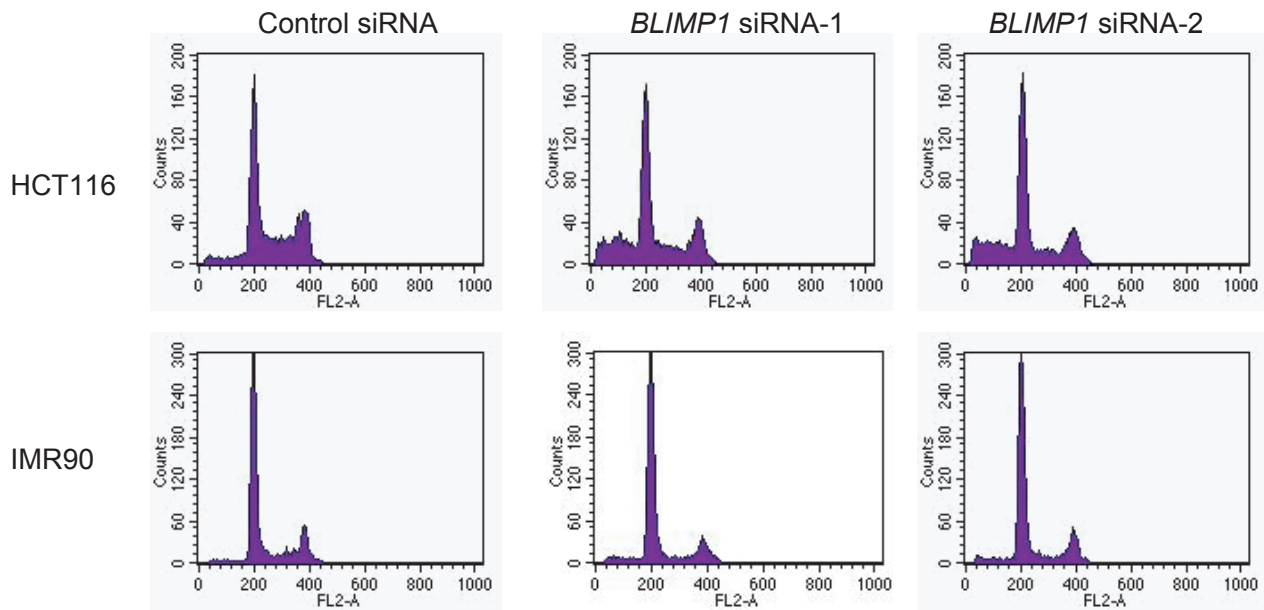

B

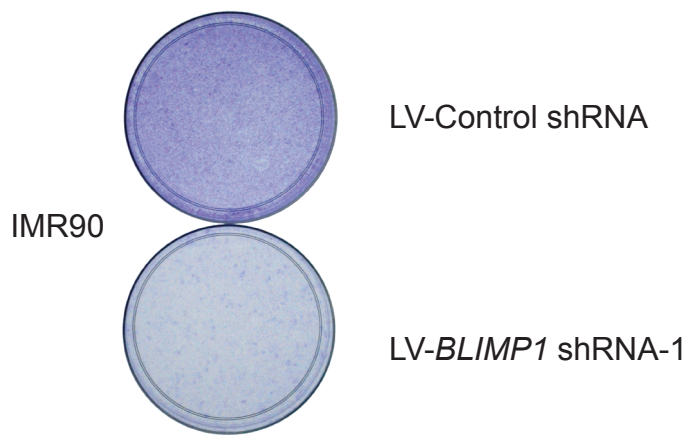

Supplement: pnas_0605562104_2.pdf [file pnas_0605562104_2.pdf]

Lamin A/C shRNA

p53 shRNA

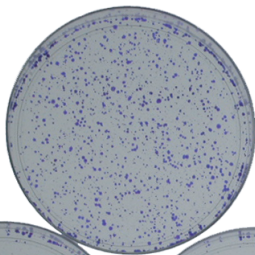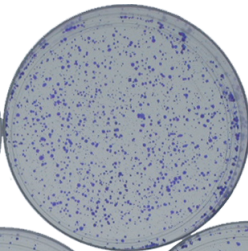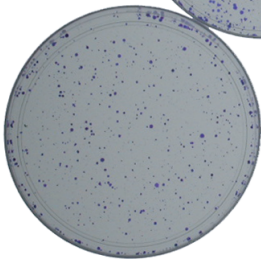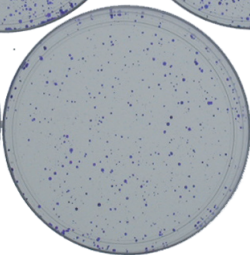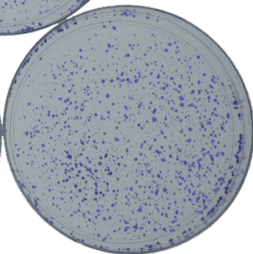

BLIMP1 shRNA

BLIMP1 shRNA  
+Lamin A/C shRNA

BLIMP1 shRNA  
+p53 shRNA

Supplement: pnas_0605562104_3.pdf [file pnas_0605562104_3.pdf]

**A**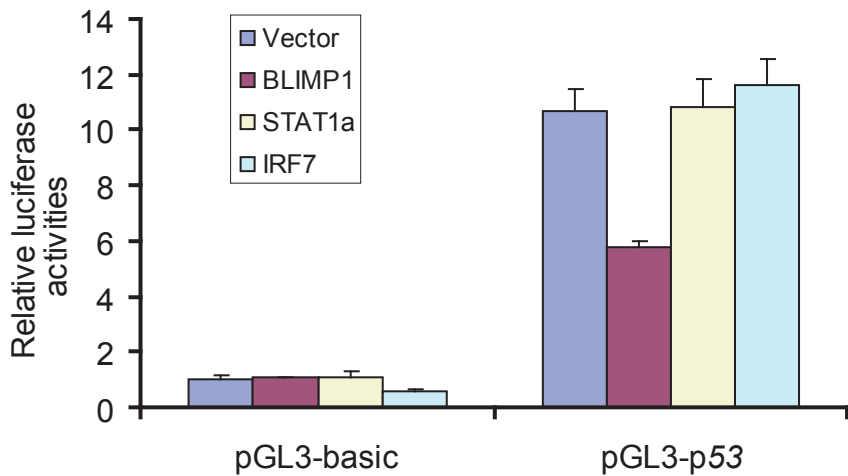**B**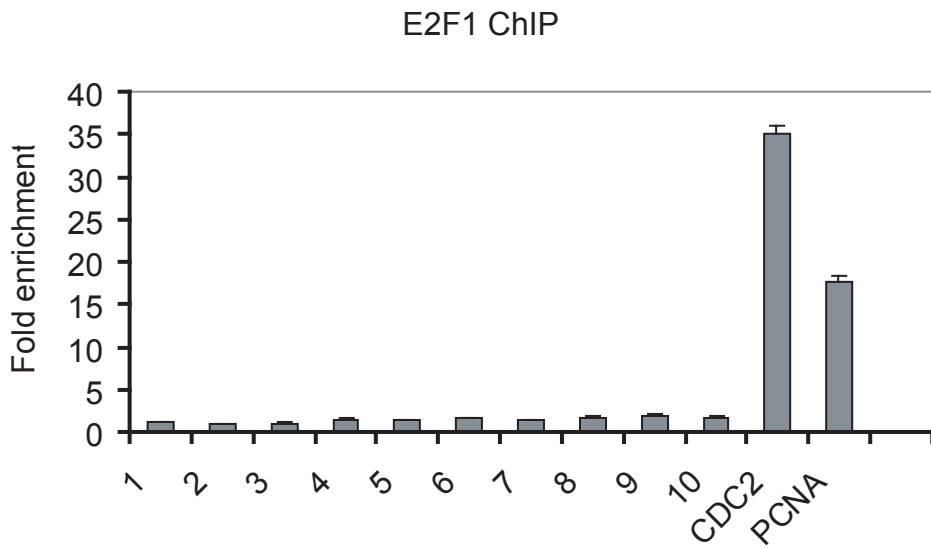

Supplement: pnas_0605562104_4.pdf [file pnas_0605562104_4.pdf]
